# Supplementary material for: Plastitar records in marine coastal environments worldwide from 1973 to 2023
Source: Frontiers journal article supplement (doi:10.3389/fmars.2023.1297150), 2023-11-08
Supplement: Table_1.xlsx [file Table_1.xlsx]

## Sheet: Tables S1, S2, S3
Table S1 Plastitar records worldwide from 1973 to 2023
Reference	Study #	Plastitar record #	Region	Region	Location	Geographic coordinates	Map	Habitat	Collection date(s)	Term(s) / description(s) used in orginal study (multiple terms / descriptions are separated by a ";")	Term used in this study	Plastic shapes contained	Plastic type	Plastic verification	Picture included	Tar amount range (g/m2)	Tar analysis	Doi / website	Key words	Search engine	Year setting
Dwivedi et al., 1974	1	1	Indian Ocean, Arabian Sea	West Indian coast	Gosabara	not reported	no	beach	July 1973	plastic beads embedded in tarball deposits on a beach	plasto-tarball	beads	not determined	visual	no	630 - 2370	TLC	https://drs.nio.org/drs/bitstream/handle/2264/5679/Mahasagar_7_91.pdf?sequence=1	plastic, oil, tar, India	Google Scholar	1970 - 1979
Gregory, 1983	2	2	Atlantic Ocean, Saragossa Sea	Bermuda	Devonshire	not reported	no	rocky shore	August - October 1978	tar-bonded beach conglomerate tarcrete; tar armoured by and/or incorporates varying amounts of plastic litter;	plasto-tar crust	granules, pellets	PE	visual	no	not reported	visual	https://doi.org/10.1016/0141-1136(83)90011-9	plastic, tar	Google Scholar	any time
	2	3	Atlantic Ocean, Saragossa Sea	Bermuda	Whalebone Bay	not reported	no	rocky shore	August - October 1978	several pellets attached to larger tar balls		granules, pellets	PE	visual	yes	not reported	visual
Wilber, 1987	3	4	Atlantic Ocean, Saragossa Sea	Bermuda	not specified	not reported	no	rocky shore	not reported	plasto-tar crusts; plasto-tarballs	plasto-tar crust; plasto-tarball	nibs	not determined	visual	yes	not reported	visual	http://www.globalgarbage.org/plastic_in_the_north_atlantic_r._jude_wilber_oceanus_1987.pdf	plastic, tar	Google Scholar	any time
	3	5	Atlantic Ocean, Saragossa Sea	Bermuda	not specified	not reported	no	beach	nor reported			nibs, debris	not determined	visual	yes	not reported	visual
	3	6	Atlantic Ocean, Saragossa Sea	Bermuda	not specified	not reported	no	ocean	not reported			nibs	not determined	visual	no	not reported	visual
	3	7	Atlantic Ocean	Bahamas	not specified	not reported	no	rocky shore	not reported			nibs	not determined	visual	no	not reported	visual
Khordagui and Abu-Hilal, 1994	4	8	Arabian Gulf	United Arab Emirates	not specified	not reported	yes	beach	September 1991 - February 1992	plastic spherules agglomerated with tar balls	plasto-tarball	pellets, spherules	PE	visual	no	not reported	visual	https://doi.org/10.1016/0269-7491(94)90143-0	plastic pellets, oil spill	Google Scholar	1990 - 1999
	4	9	Gulf of Oman	United Arab Emirates	not specified	not reported	yes	beach	September 1991 - February 1992			pellets, spherules	PE	visual	no	not reported	visual
Turner and Holmes, 2011	5	10	Central Mediterranean Sea	Maltese Islands	Malta, Slugs Bay	not reported	yes	rocky shore	not reported	pellets embedded in tar deposits	plasto-tar crust	pellets	PE	FTIR	yes	not reported	visual	https://doi.org/10.1016/j.marpolbul.2010.09.027	pellets, tar	Google Scholar	any time
	5	11	Central Mediterranean Sea	Maltese Islands	Malta, Pembroke	not reported	yes	rocky shore	not reported			pellets	PE	FTIR	no	not reported	visual
Fajkovic et al., 2020	6	12	Mediterranean Sea, Adriatic Sea	Croatia	Žirje island	not reported	no	beach	not reported	plasto-tarball; aggregations of plastic debris, pellets, and fragments with tar-balls	plasto-tarball	fibers, particles	PE, PP, PVC	FTIR	no	not reported	GC/MS	https://www.researchgate.net/publication/349338376_Correlation_of_microplastic_type_and_metal_association_Croatian_coast_case_study_Zirje_Island	plasto-tarball	Google	na
Domínguez-Hernández et al., 2022	7	13	Atlantic Ocean	Canary Islands	Tenerife, Playa Grande beach	28.152786, -16.431611	yes	rocky shore	September 2019 - January 2022	plastitar; a combination of tar and microplastics covers rocky shores; plastic particles + tar → plastitar; plastic formation composed of plastic and tar;	plasto-tar crust	pellets, fragments, lines	PE, PP	FTIR	yes	not reported	GC-FID	https://doi.org/10.1016/j.scitotenv.2022.156261	plastitar	Google Scholar	any time
	7	14	Atlantic Ocean	Canary Islands	Tenerife, Malpaís de Güímar coast	28.307778, -16.361944	yes	rocky shore	January 2021 - January 2022	microplastics (mesoplastics, though to a lesser extent, can also be distinguished) have been embedded in the tar matrix;		pellets, fragments, lines	not determined	visual	yes	not reported	visual
	7	15	Atlantic Ocean	Canary Islands	El Hierro, Arenas Blancas beach	27.766850, -18.121772	yes	rocky shore	June 2020 - January 2022	an agglomerate of tar and mainly microplastics of 1–5 mm size which are attached to the rock surface		pellets, fragments, lines	not determined	visual	yes	not reported	visual
	7	16	Atlantic Ocean	Canary Islands	Lanzarote, Famara coast	29.120231, -13.566892	yes	rocky shore	June 2020 - January 2022			pellets, fragments, lines	not determined	visual	yes	not reported	visual
Ellrich et al., 2023 (this study)	8	17	Sea of Japan	Yamaguchi Prefecture, Japan	Kanda, Houhoku-cho, Shimonoseki City	34.333792, 130.890457	no	rocky shore	2022-08-07	na	plastitar, plasto-tar crust	fragments	PE	FTIR	yes	not reported	FTIR, GC/MS	na	na	na	na
	8	18	Western Mediterranean Sea	Balearic Islands	Mallorca, Cala Rajada	39.707667, 3.460100	no	rocky shore	18 February 2023			fibers	PE	FTIR	yes	not reported	FTIR, GC/MS
Utami et al., 2023	9	19	Java Sea	Indonesia	Panjang Island, Banten Bay	not reported	yes	coral rubble beach	not reported	plastitar; an agglomerate of tar and plastics that adheres to coastal rocks	plastitar, plasto-tar crust	debris (lid)	LDPE	FTIR	yes	not reported	GC/MS	https://doi.org/10.1038/s41598-023-37594-z	plastitar	Google Scholar	any time
Saliu et al., 2023	10	20	Ligurian Sea	Italy	Sturla	44.391500, 8.986194	yes	not reported	2022-09-12	plastitar	plasto-tar crust	fragments, nurdles, lines, films, foams	PE, PP, PA, PVC, PS	FTIR	yes	not reported	GC/MS	https://doi.org/10.1016/j.marpolbul.2023.115583	plastitar	Google Scholar	any time
	10	21	Ligurian Sea	Italy	Bogliasco, Pontetto	44.375417, 9.076333	yes	not reported	2022-08-15		plasto-tar crust				yes
	10	22	Western Mediterranean Sea	Balearic Islands	Carbrera	39.143968, 2.936727	yes	sandy and rocky beach	2019-07-31		plasto-tar crust				yes
	10	23	Western Mediterranean Sea	Balearic Islands	Menorca	39.925618, 3.897832	yes	rocky shoreline	2022-11-13		plasto-tar crust				yes
	10	24	Adriatic Sea	Italy	Specchiola Carovingo	40.730444, 17.755472	yes	not reported	2022-07-06		plasto-tar crust				yes
	10	25	Western Mediterranean Sea	Sardinia	Capo Mannu	40.051194, 8.401556	yes	rocky cape	2022-08-06		plasto-tar crust				yes
	10	26	Western Mediterranean Sea	Sardinia	Cala Sapone	39.007167, 8.384583	yes	rocky shore	2022-11-14		plasto-tar crust				yes
	10	27	Western Mediterranean Sea	Sardinia	Calavinagra	39.163889, 8.241722	yes	not reported	2022-12-20		plasto-tar crust				yes
	10	28	Western Mediterranean Sea	Sardinia	Cala di Memmerosso	39.178194, 8.280444	yes	rocky inlet	12 April 2018 - 19 December 2022		plasto-tar crust				yes
	10	29	Western Mediterranean Sea	Sardinia	Capo Spalmatore	39.116694, 8.257722	yes	not reported	2022-12-16		plasto-tar crust				yes
	10	30	Western Mediterranean Sea	Sardinia	Capo Sandalo	39.144639, 8.222389	yes	rocky inlet	2022-12-23		plasto-tar crust				yes
	10	31	Western Mediterranean Sea	Sardinia	Capo Testa	41.237694, 9.141694	yes	rocky inlet	2022-08-14		plasto-tar crust				yes
Abbreviations:
FTIR: Fourier-transform infrared spectroscopy
TLC: Thin layer chromatography
GC/MS: gas chromatography/mass spectrometry
GC-FID: gas chromatography-flame ionization detectors
na: not applicable
Table S2 Plastic and tar co-occurrence records worldwide from 1973 to 2021
Reference	Study #	Plastic-tar cooccurence record #	Region	Region or Route	Location	Geographic coordinates	Map	Habitat	Collection date(s)	Description(s) used in orginal study	Term used in this study	Plastic shapes contained	Plastic type	Plastic verification	Picture included	Tar amount range (g/m2)	Tar analysis	Doi / website	Key words	Search engine	Year setting
Wellman, 1973	1	1	Atlantic Ocean	New York, USA to Hugh Town, Isles of Scilly, UK	not specified	not reported	yes	ocean	31 May 1973 to 3 July 1973	oil fragments; irregular chips of sheet plastic embedded in oil	na	sheets, spherules	not determined	visual	no	not reported	visual	https://doi.org/10.1016/0025-326X(73)90228-2	plastic, oil, Atlantic	Google Scholar	1970 - 1979
Dwivedi et al., 1974	2	2	Indian Ocean, Arabian Sea	West Indian coast	Prabhasputtam Somnath	not reported	no	beach	1973-07-01	plastic beads found associated with tar-ball deposition on beach	na	beads	not determined	visual	no	0.72 - 250.90	visual	https://drs.nio.org/drs/bitstream/handle/2264/5679/Mahasagar_7_91.pdf?sequence=1	plastic, oil, tar, India	Google Scholar	1970 - 1979
Dwivedi and Parulekar, 1974	3	3	Indian Ocean, Arabian Sea	West Indian coast	Maravanthe	not reported	no	beach	1972-08-09	plastic beads found associated with tar-ball deposition on beach	na	beads	not determined	visual	no	10.6 - 344.8	visual	http://drs.nio.org/drs/handle/2264/5680	plastic, oil, tar, India	Google Scholar	1970 - 1979
	3	4	Indian Ocean, Arabian Sea	West Indian coast	Ratnagiri	not reported	no	beach	20 July 1972	plastic beads found associated with tar-ball deposition on beach	na	beads	not determined	visual	no	28.5 - 247.7	visual
Dwivedi et al., 1975	4	5	Indian Ocean, Arabian Sea	West Indian coast	Bogmalo	not reported	yes	beach	25 June 1974	plastic beads found associated with tar-ball deposition on beach	na	beads	not determined	visual	no	37 - 168	TLC	https://drs.nio.org/drs/handle/2264/5603	plastic, oil, tar, India	Google Scholar	1970 - 1979
	4	6	Indian Ocean, Arabian Sea	West Indian coast	Polem	not reported	yes	beach	2 July 1974	plastic beads found associated with tar-ball deposition on beach	na	beads	not determined	visual	no	18 - 20.4	TLC
	4	7	Indian Ocean, Arabian Sea	West Indian coast	Baga	not reported	yes	beach	4 July 1974	plastic beads found associated with tar-ball deposition on beach	na	beads	not determined	visual	no	56.9 - 133.2	TLC
	4	8	Indian Ocean, Arabian Sea	West Indian coast	Candolim	not reported	yes	beach	4 July 1974	plastic beads found associated with tar-ball deposition on beach	na	beads	not determined	visual	no	76.9 - 266.3	TLC
	4	9	Indian Ocean, Arabian Sea	West Indian coast	Anjuna	not reported	yes	beach	4 July 1974	plastic beads found associated with tar-ball deposition on beach	na	beads	not determined	visual	no	84.6 - 355.2	TLC
	4	10	Indian Ocean, Arabian Sea	West Indian coast	Vagator	not reported	yes	beach	4 July 1974	plastic beads found associated with tar-ball deposition on beach	na	beads	not determined	visual	no	308.4 - 327.2	TLC
	4	11	Indian Ocean, Arabian Sea	West Indian coast	Morjim	not reported	yes	beach	4 July 1974	plastic beads found associated with tar-ball deposition on beach	na	beads	not determined	visual	no	203.2 - 352.4	TLC
	4	12	Indian Ocean, Arabian Sea	West Indian coast	Calangute	not reported	yes	beach	4 July 1974	plastic beads found associated with tar-ball deposition on beach	na	beads	not determined	visual	no	24.4 - 132.2	TLC
	4	13	Indian Ocean, Arabian Sea	West Indian coast	Mandrem	not reported	yes	beach	4 July 1974	plastic beads found associated with tar-ball deposition on beach	na	beads	not determined	visual	no	62.8 - 90.1	TLC
	4	14	Indian Ocean, Arabian Sea	West Indian coast	Sinquerim	not reported	yes	beach	4 July 1974	plastic beads found associated with tar-ball deposition on beach	na	beads	not determined	visual	no	734.8 - 1873.6	TLC
Unnithan et al., 1981	5	15	Indian Ocean, Arabian Sea	West Indian coast	Kerala	not reported	no	beach	1977 - 1980	plastic beads found associated with tar-ball deposition on beach	na	beads	not determined	visual	no	47.5 - 557.5	visual	http://nopr.niscpr.res.in/handle/123456789/39116	plastic, oil, tar, India	Google Scholar	1980 - 1989
Shiber, 1989	6	16	Arabian Gulf	Kuwait	Al Jahra	not reported	yes	beach	April - May 1986	plastic particle, tar ball and tar lump co-occurence	na	particles, pellets	not determined	visual	no	not reported	visual	https://doi.org/10.1016/0269-7491(89)90088-2	plastic, oil, tar, Kuwait	Google Scholar	1980 - 1989
	6	17	Arabian Gulf	Kuwait	Suleibkhat	not reported	yes	beach	April - May 1986	plastic particle, tar ball and tar lump co-occurence	na	particles, pellets	not determined	visual	no	not reported	visual
	6	18	Arabian Gulf	Kuwait	Ras Ajouzah	not reported	yes	beach	April - May 1987	plastic particle, tar ball and tar lump co-occurence	na	particles, pellets	not determined	visual	no	not reported	visual
	6	19	Arabian Gulf	Kuwait	Salmiyah	not reported	yes	beach	April - May 1988	plastic particle, tar ball and tar lump co-occurence	na	particles, pellets	not determined	visual	no	not reported	visual
	6	20	Arabian Gulf	Kuwait	Sief Palace	not reported	yes	beach	April - May 1989	plastic particle, tar ball and tar lump co-occurence	na	particles, pellets	not determined	visual	no	not reported	visual
	6	21	Arabian Gulf	Kuwait	Fintas	not reported	yes	beach	April - May 1990	plastic particle, tar ball and tar lump co-occurence	na	particles, pellets	not determined	visual	no	not reported	visual
	6	22	Arabian Gulf	Kuwait	Fahaheel	not reported	yes	beach	April - May 1991	plastic particle, tar ball and tar lump co-occurence	na	particles, pellets	not determined	visual	no	not reported	visual
	6	23	Arabian Gulf	Kuwait	Green House	not reported	yes	beach	April - May 1992	plastic particle, tar ball and tar lump co-occurence	na	particles, pellets	not determined	visual	no	not reported	visual
	6	24	Arabian Gulf	Kuwait	Green House (Al Adami)	not reported	yes	beach	April - May 1993	plastic particle, tar ball and tar lump co-occurence	na	particles, pellets	not determined	visual	no	not reported	visual
	6	25	Arabian Gulf	Kuwait	Ras AzZour	not reported	yes	beach	April - May 1994	plastic particle, tar ball and tar lump co-occurence	na	particles, pellets	not determined	visual	no	not reported	visual
	6	26	Arabian Gulf	Kuwait	New Al Khiran	not reported	yes	beach	April - May 1995	plastic particle, tar ball and tar lump co-occurence	na	particles, pellets	not determined	visual	no	not reported	visual
	6	27	Arabian Gulf	Kuwait	Old Al Khiran	not reported	yes	beach	April - May 1996	plastic particle, tar ball and tar lump co-occurence	na	particles, pellets	not determined	visual	no	not reported	visual
Abu-Hilal and Khordagui, 1993	7	17	Arabian Gulf	United Arab Emirates	not specified	not reported	yes	beach	September 1991 - March 1992	tar mixed with plastic spherules	na	pellets, spherules	not determined	visual	no	0 - 48600	visual	https://doi.org/10.1016/0160-4120(93)90310-E	plastic pellets, oil spill	Google Scholar	1990 - 1999
	7	18	Gulf of Oman	United Arab Emirates	not specified	not reported	yes	beach	September 1991 - March 1992	tar mixed with plastic spherules	na	pellets, spherules	not determined	visual	no	not reported	visual
Dufault and Whitehead, 1994	8	19	Atlantic Ocean	Canada	Nova Scotia	not reported	yes	ocean	Summer 1990	plastic and tar co-occurence	na	plastic debris, plasstic pellets	not determined	visual	no	2.07 x 10-7 - 2.32 x 10-5	visual	https://doi.org/10.1016/0025-326X(94)90522-3	plastic, tar, Nova Scotia	Google Scholar	1990 - 1999
Herrera et al., 2017	9	20	Atlantic Ocean	Canary Islands	Lambra, La Graciosa island	29.279383, -13.495600	yes	beach	September 2015 - September 2016	microplastic, mesoplastic and tar pollution	na	pellets, fragments	not determined	visual	yes	not reported	visual	http://dx.doi.org/10.1016/j.marpolbul.2017.10.020	plastic, tar, Atlantic	Google Scholar	2010 - 2019
	9	21	Atlantic Ocean	Canary Islands	Famara, Lanzarote island	29.115283, -13.558340	yes	beach	September 2015 - September 2016	microplastic, mesoplastic and tar pollution	na	pellets, fragments	not determined	visual	yes	not reported	visual
	9	22	Atlantic Ocean	Canary Islands	Las Canteras, Gran Canaria island	28.130900, -15.446250	yes	beach	September 2015 - September 2016	microplastic, mesoplastic and tar pollution	na	pellets, fragments	not determined	visual	yes	not reported	visual
Hernández-Sánchez et al., 2021	10	23	Atlantic Ocean	Canary Islands	Arenas Blancas, El Hierro island	27.766850, -18.121772	yes	beach	30 October 2019 - 15 May 2020	plastic and tar co-occurence	na	fibers, fragments, lines, foams, films pellets	PE, PP, PS	FTIR	no	not reported	visual	https://doi.org/10.1016/j.marpolbul.2021.112548	plastic, tar, Atlantic	Google Scholar	2020 - 2023
Table S3 Tarred plastic records worldwide from 1979 to 2009
Reference	Study #	Tarred plastic record #	Region	Region or Route	Location	Geographic coordinates	Map	Habitat	Collection date(s)	Term(s) / description(s) used in orginal study (multiple terms/descriptions are separated by a ";")	Term used in this study	Plastic shapes contained	Plastic type	Plastic verification	Picture included	Tar amount range (g/m2)	Tar analysis	Doi / website	Key words	Search engine	Year setting
Shiber, 1979	1	1	Eastern Mediterranean Sea	Lebanese coast	Ramlet-el-Baida	not reported	yes	beach	Summer and Fall 1977	pellets had tar on them	na	pellets	PE, PMMA, PS	Thermal analysis	yes	not reported	visual	https://doi.org/10.1016/0025-326X(79)90321-7	plastic, pellet, tar, Mediterranean	Google Scholar	1970 - 1979
	1	2	Eastern Mediterranean Sea	Lebanese coast	American University of Beirut	not reported	no	beach	Summer and Fall 1977		na	pellets	PE, PMMA, PS	Thermal analysis	yes	not reported	visual
Shiber, 1982	2	3	Western Mediterranean Sea	Costa del Sol, Spain	La Linea	not reported	yes	beach	October 1980 - April 1981	pellets looked greyish, probably due to the the effects of close contact with tar	na	pellets	Evac, PE	visual	yes	not reported	visual	https://doi.org/10.1016/0025-326X(82)90014-5	plastic, pellet, tar, Mediterranean	Google Scholar	any time
	2	4	Western Mediterranean Sea	Costa del Sol, Spain	Sabinillas	not reported	yes	beach	October 1980 - April 1981		na	pellets	Evac, PE	visual	yes	not reported	visual
	2	5	Western Mediterranean Sea	Costa del Sol, Spain	Puerto Banus	not reported	yes	beach	October 1980 - April 1981		na	pellets	Evac, PE	visual	yes	not reported	visual
	2	6	Western Mediterranean Sea	Costa del Sol, Spain	Marbella	not reported	yes	beach	October 1980 - April 1981		na	pellets	Evac, PE	visual	yes	not reported	visual
	2	7	Western Mediterranean Sea	Costa del Sol, Spain	Malaga	not reported	yes	beach	October 1980 - April 1981		na	pellets	Evac, PE	visual	yes	not reported	visual
Gregory, 1983	3	8	Atlantic Ocean	Halifax, Nova Scotia, Canada	North West Arm	not reported	yes	beach	August - October 1978	plastic garnules with a tarry coating	na	granules	PE	visual	yes	not reported	visual	https://doi.org/10.1080/00288330.1978.9515768	plastic, tar	Google Scholar	any time
	3	9	Atlantic Ocean	Halifax, Nova Scotia, Canada	Point Pleasant	not reported	yes	beach	August - October 1978		na	granules	PE	visual	yes	not reported	visual
	3	10	Atlantic Ocean, Sargosssa Sea	Bermuda	not specified	not reported	yes	beach	August - October 1978		na	granules	PE	visual	yes	not reported	visual
Wilber, 1987	4	11	Atlantic Ocean	Bermuda	not specified	not reported	no	beach		tarred plastic fragments	na	fragments	not determined	visual	yes	not reported	visual	http://www.globalgarbage.org/plastic_in_the_north_atlantic_r._jude_wilber_oceanus_1987.pdf	plastic, tar	Google Scholar	any time
Shiber, 1989	5	12 to 24	Arabian Gulf	Kuwait	12 beaches	not reported	yes	beach	April - May 1986	plastic particles with traces of tar	na	particles	PE, PP, PS	infrared spectrophotometry	yes	not reported	visual	https://doi.org/10.1016/0269-7491(89)90088-2	plastic, pellet, tar, Mediterranean	Google Scholar	1980 - 1989
van Franeker, 1989	6	25	North Sea	The Netherlands	Ijmuiden - Wijk aan Zee	not reported	no	beach	1989-10-18	tarred plastic pellets	na	pellets	not determined	visual	no	not reported	visual	https://natuurtijdschriften.nl/pub/553466	plastic, pellet, tar, North Sea	Google Scholar	any time
Shiber and Barrales-Rienda, 1991	7	26	Eastern Mediterranean Sea	Lebanese coast	Beirut	not reported	yes	beach, rocky shore	March - April 1988	plastic pellets with tar on the surface	na	pellets	PE, PP, EVA, maleate resin	infrared spectrophotometry	no	not reported	visual	https://doi.org/10.1016/0269-7491(89)90088-2	plastic, pellet, tar, Mediterranean	Google Scholar	any time
Dufault and Whitehead, 1994	8	27	Atlantic Ocean	Canada	Nova Scotia	not reported	yes	ocean	Summer 1990	tarred plastic	na	plastic debris, plasstic pellets	not determined	visual	no	not reported	visual	https://doi.org/10.1016/0025-326X(94)90522-3	plastic, tar, Nova Scotia	Google Scholar	1990 - 1999
Abu-Hilal and Al-Najjar, 2009	9	28 to 32	Red Sea, Gulf of Aquaba	Jordan	5 beaches	reported	yes	beach	March - August 1994, 1995	pellets tainted from organic matter or oil	na	pellets	PE	none	ne	not reported	na	http://dx.doi.org/10.1080/14634980903361200	plastic, pellet, tar, Red Sea	Google Scholar	any time
